# Supplementary material
Source: publisher figshare collection journal article supplement (https://tandf.figshare.com/ndownloader/files/39646683)
Supplement: Supplementary file 1 [file 39646683]

# Improving footwear for netball players

---

Start of Block: Default Question Block

## Improving footwear for netball players

Despite the importance of wearing appropriate footwear to enhance performance and minimise injury risk in netball, three-quarters of netball players do not wear the correct shoes for the sport.

In this survey we aim to assess the perceptions of netball players on the design and performance of current netball footwear in order to identify potential netball shoe design features that affect shoe fit and comfort. If you choose to participate, you will answer questions about your footwear habits, any foot pain and/or lower limb injury you have experienced, and what you like and dislike about the shoes you have worn for netball in the **last 12 months**.

To complete this on-line survey, you must be: 16 years of age or older and participated in at least 1 season of representative netball in the last 2 years. It will take approximately **10 minutes** to complete the survey.

This survey is being conducted as part of a PhD thesis by Maddison Kirk at the University of Wollongong. For more information please find attached a Participant Information Sheet: [Participant information sheet](#)

By clicking on the button below, you consent to participate in this survey.

---

Page Break

## I. About you

*In this section we want to learn about you and your involvement with netball.*

What netball have you played during the **last 12 months**? Please select all that apply.

- ☐ Women's netball
- ☐ Men's netball
- ☐ Mixed netball

*Display This Question:*

*If What netball have you played during the last 12 months? Please select all that apply. = Mixed netball*

Sex:

- ☐ Male
- ☐ Female

Please write your **age** (years):

---

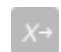

What **country** have you primarily competed netball in during the **last 12 months**?

- ☐ Australia
- ☐ New Zealand
- ☐ England
- ☐ South Africa
- ☐ Other: \_\_\_\_\_

---

*Display This Question:*

*If What netball have you played during the last 12 months? Please select all that apply. = Men's netball*

*And What country have you primarily competed netball in during the last 12 months? != Australia*

What is the highest level of Men's netball that you have competed in during the **last 12 months**?

\_\_\_\_\_

---

*Display This Question:*

*If What netball have you played during the last 12 months? Please select all that apply. = Mixed netball*

*And What country have you primarily competed netball in during the last 12 months? != Australia*

What is the highest level of Mixed netball that you have competed in during the **last 12 months**?

\_\_\_\_\_

---

*Display This Question:*

*If What netball have you played during the last 12 months? Please select all that apply. = Men's netball*

*And What country have you primarily competed netball in during the last 12 months? = Australia*

What is the **highest level** of Men's netball that you have competed in during the **last 12 months**?

- ☐ Social/club
- ☐ Men's League
- ☐ State team
- ☐ International

*Display This Question:*

*If What netball have you played during the last 12 months? Please select all that apply. = Mixed netball*

*And What country have you primarily competed netball in during the last 12 months? = Australia*

What is the **highest level** of Mixed netball that you have competed in during the **last 12 months**?

- ☐ Social/club
- ☐ Men's League
- ☐ State team
- ☐ International

## **II. About the shoes you wear during netball**

*In this section we want to learn about the shoes you wear during netball and what you like/dislike about them.*

What is your shoe size for the shoes you **currently** wear for netball (US sizing)? Please select at least one size from one column.

|               | Men's              |
|---------------|--------------------|
| Shoe size (1) | ▼ 5 (1 ... 20 (20) |

Do you **currently** wear a shoe **specifically manufactured for netball** during your netball activity? (e.g. Asics Netburner)

- ☐ Yes
- ☐ No
- ☐ I don't know

---

*Display This Question:*

*If Do you currently wear a shoe specifically manufactured for netball during your netball activity?... = No*

Please explain **why** you choose **not** to wear a shoe specifically manufactured for netball during your netball activity?

---

---

---

---

---

Answer the following questions about the **current** shoes you wear for netball. How satisfied are you with the following **shoe functions**?

|                                                        | Extremely<br>satisfied | Satisfied             | Neutral               | Dissatisfied          | Extremely<br>dissatisfied |
|--------------------------------------------------------|------------------------|-----------------------|-----------------------|-----------------------|---------------------------|
| <b>Comfort</b>                                         | <input type="radio"/>  | <input type="radio"/> | <input type="radio"/> | <input type="radio"/> | <input type="radio"/>     |
| <b>Ankle<br/>support</b>                               | <input type="radio"/>  | <input type="radio"/> | <input type="radio"/> | <input type="radio"/> | <input type="radio"/>     |
| <b>Arch<br/>support</b>                                | <input type="radio"/>  | <input type="radio"/> | <input type="radio"/> | <input type="radio"/> | <input type="radio"/>     |
| <b>Heel support</b>                                    | <input type="radio"/>  | <input type="radio"/> | <input type="radio"/> | <input type="radio"/> | <input type="radio"/>     |
| <b>Length fit</b>                                      | <input type="radio"/>  | <input type="radio"/> | <input type="radio"/> | <input type="radio"/> | <input type="radio"/>     |
| <b>Width fit</b>                                       | <input type="radio"/>  | <input type="radio"/> | <input type="radio"/> | <input type="radio"/> | <input type="radio"/>     |
| <b>Cushioning</b>                                      | <input type="radio"/>  | <input type="radio"/> | <input type="radio"/> | <input type="radio"/> | <input type="radio"/>     |
| <b>Toe space</b>                                       | <input type="radio"/>  | <input type="radio"/> | <input type="radio"/> | <input type="radio"/> | <input type="radio"/>     |
| <b>Breathability</b>                                   | <input type="radio"/>  | <input type="radio"/> | <input type="radio"/> | <input type="radio"/> | <input type="radio"/>     |
| <b>Appearance</b>                                      | <input type="radio"/>  | <input type="radio"/> | <input type="radio"/> | <input type="radio"/> | <input type="radio"/>     |
| <b>Upper<br/>material (i.e.<br/>leather,<br/>mesh)</b> | <input type="radio"/>  | <input type="radio"/> | <input type="radio"/> | <input type="radio"/> | <input type="radio"/>     |
| <b>Durability</b>                                      | <input type="radio"/>  | <input type="radio"/> | <input type="radio"/> | <input type="radio"/> | <input type="radio"/>     |
| <b>Other<br/>(Optional):</b>                           | <input type="radio"/>  | <input type="radio"/> | <input type="radio"/> | <input type="radio"/> | <input type="radio"/>     |
